# Supplementary material for: Clinical outcomes of breakthrough COVID-19 after booster vaccination in patients with systemic rheumatic diseases
Source: HighWire-hosted journal article supplement (doi:10.1136/rmdopen-2022-002279), 2022-03-01
Supplement: rmdopen-2022-002279supp001_data_supplement.pdf [file rmdopen-2022-002279supp001_data_supplement.pdf]

**Supplementary Table-1:** Demographic and clinical characteristics of patients with SRDs.

| Parameter                                       | Vaccination status     |                            |                              |
|-------------------------------------------------|------------------------|----------------------------|------------------------------|
|                                                 | Unvaccinated<br>(n=60) | Fully-vaccinated<br>(n=36) | Booster-vaccinated<br>(n=65) |
| Age (years), mean±SD                            | 48.2 ± 14.9            | 44.3 ± 14.1                | 49.3± 16.3                   |
| Female gender, n (%)                            | 37 (61.7)              | 26 (72.2)                  | 49 (75.4)                    |
| BMI, mean±SD                                    | 27.5 ± 6.5             | 26.6 ± 6.2                 | 25.3± 5.1                    |
| Current smoker, n (%)                           | 13 (21.6)              | 8 (22.2)                   | 10 (15.4)                    |
| <b>SRD</b>                                      |                        |                            |                              |
| Inflammatory arthritis, n (%)                   | 29 (48.3)              | 17(47.2)                   | 36 (55.4)                    |
| Connective tissue diseases <sup>#</sup> , n (%) | 22 (36.7)              | 12 (33.3)                  | 24 (36.9)                    |
| Systemic vasculitis, n (%)                      | 4 (6.7)                | 6 (16.6)                   | 1 (1.5)                      |
| Autoinflammatory, n (%)                         | 5 (8.3)                | 1 (2.8)                    | 4 (6.1)                      |
| <b>Comorbidities, n (%)</b>                     |                        |                            |                              |
| Diabetes, n (%)                                 | 3 (5.0)                | 0 (0.0)                    | 5 (7.7)                      |
| Hypertension, n (%)                             | 8 (13.3)               | 3(8.3)                     | 14 (21.5)                    |
| Cardiovascular disease, n (%)                   | 0 (0.0)                | 1(2.8)                     | 1 (1.5)                      |
| Stroke, n (%)                                   | 2 (3.3)                | 1(2.8)                     | 4 (6.1)                      |
| Lung disease, n (%)                             | 10 (16.7)              | 1(2.8)                     | 13 (20.0)*                   |
| Malignancy, n (%)                               | 2 (3.3)                | 0(0.0)                     | 2 (3.1)                      |
| <b>Disease status</b>                           |                        |                            |                              |
| Remission                                       | 37 (61.7)              | 23 (63.9)                  | 47 (70.7)                    |
| Low disease activity                            | 20 (33.3)              | 8 (22.2)                   | 15 (24.6)                    |
| Moderate disease activity                       | 3 (5.0)                | 3 (8.3)                    | 3 (4.6)                      |
| High disease activity                           | 0 (0.0)                | 2 (5.6)                    | 0 (0.0)                      |
| <b>Treatment currently received</b>             |                        |                            |                              |
| Glucocorticoids, n (%)                          | 19 (31.7)              | 12 (33.3)                  | 27 (41.5)                    |
| csDMARDs, n (%)                                 | 29 (48.3)              | 15 (41.7)                  | 37 (55.5)                    |
| Apremilast, n (%)                               | 3 (5.0)                | 0 (0.0)                    | 1 (1.5)                      |
| JAK inhibitors, n (%)                           | 2 (3.3)                | 1 (2.8)                    | 3(4.6)                       |
| bDMARDs, n (%)                                  | 20 (33.3)              | 12 (33.3)                  | 22 (33.8)                    |
| Rituximab, n (%)                                | 0 (0.0)                | 1(2.8)                     | 0 (0.0)                      |
| Other immunosuppressants <sup>^</sup> , n (%)   | 8 (13.3)               | 6 (16.6)                   | 4 (6.1)                      |
| <b>Type of vaccines</b>                         |                        |                            |                              |
| BNT162b2 (Pfizer–BioNTech), n (%)               | NA                     | 31                         | 62                           |
| mRNA-1273 (Moderna), n (%)                      | NA                     | 1                          | 2                            |
| ChAdOx1 nCoV-19 (Astra-Zeneca), n (%)           | NA                     | 4                          | 0                            |
| Ad26.CoV2.S (Johnson & Johnson), n (%)          | NA                     | 0                          | 1                            |

n: number, SD: standard deviation, SRD: systemic rheumatic disease, BMI: body mass index, csDMARDs: conventional synthetic disease modifying antirheumatic drugs, bDMARDs: biologic DMARDs, NA: not applicable, \*p=0.04

<sup>#</sup>Connective tissue diseases: SLE, Systemic sclerosis, anti-phospholipid syndrome, mixed connective tissues disease, <sup>^</sup> mycophenolate mofetil, azathioprine, cyclosporine

**Supplementary Table 2:** Characteristics and outcomes of booster vaccinated individuals with and without SRDs

|                                                                             | Booster-vaccinated individuals<br>without SRD<br>(n=80) | Booster-vaccinated patients<br>with SRD<br>(n=65) |
|-----------------------------------------------------------------------------|---------------------------------------------------------|---------------------------------------------------|
| <b>Characteristics</b>                                                      |                                                         |                                                   |
| Age (years), mean±SD                                                        | 46.7± 14.3                                              | 49.3± 16.3                                        |
| Female gender, n (%)                                                        | 50 (62.5)                                               | 49 (75.4)                                         |
| BMI, mean±SD                                                                | 25.4 ± 3.9                                              | 25.3± 5.1                                         |
| Current smoker, n (%)                                                       | 22 (27.5)                                               | 10 (15.4)                                         |
| <b>Comorbidities</b>                                                        |                                                         |                                                   |
| Diabetes, n (%)                                                             | 6 (7.5)                                                 | 5 (7.7)                                           |
| Hypertension, n (%)                                                         | 11 (13.8)                                               | 14 (21.5)                                         |
| Cardiovascular disease, n (%)                                               | 1 (1.3)                                                 | 1 (1.5)                                           |
| Stroke, n (%)                                                               | 0 (0.0)                                                 | 4 (6.1)                                           |
| Lung disease, n (%)                                                         | 1 (1.25)                                                | 13 (20.0)*                                        |
| Malignancy, n (%)                                                           | 2 (2.5)                                                 | 2 (3.1)                                           |
| Time from third vaccine dose<br>to breakthrough Covid-19<br>(days), mean±SD | 70 ±31                                                  | 81 ±66                                            |
| <b>Type of vaccines</b>                                                     |                                                         |                                                   |
| BNT162b2 (Pfizer–BioNTech), n<br>(%)                                        | 71                                                      | 62                                                |
| mRNA-1273 (Moderna), n (%)                                                  | 6                                                       | 2                                                 |
| ChAdOx1 nCoV-19 (Astra-<br>Zeneca), n (%)                                   | 3 <sup>^</sup>                                          | 0                                                 |
| Ad26.CoV2.S (Johnson &<br>Johnson), n (%)                                   | 0                                                       | 1                                                 |
| <b>Outcomes</b>                                                             |                                                         |                                                   |
| Non-invasive ventilation, n (%)                                             | 0 (0.0)                                                 | 0 (0.0)                                           |
| Hospitalization, n (%)                                                      | 1 (1.25)                                                | 2 (3.1)                                           |
| Death, n (%)                                                                | 0 (0.0)                                                 | 0 (0.0)                                           |

n: number, SD: standard deviation, BMI: body mass index, <sup>^</sup> BNT162b2 as booster, \*p= 0.0001
